# Supplementary material for: Influence of mobile genetic elements and insertion sequences in long- and short-term adaptive processes of Acidithiobacillus ferrooxidans strains
Source: PubMed Central journal article supplement (PMC10322971; doi:10.1038/s41598-023-37341-4), 2023-07-05

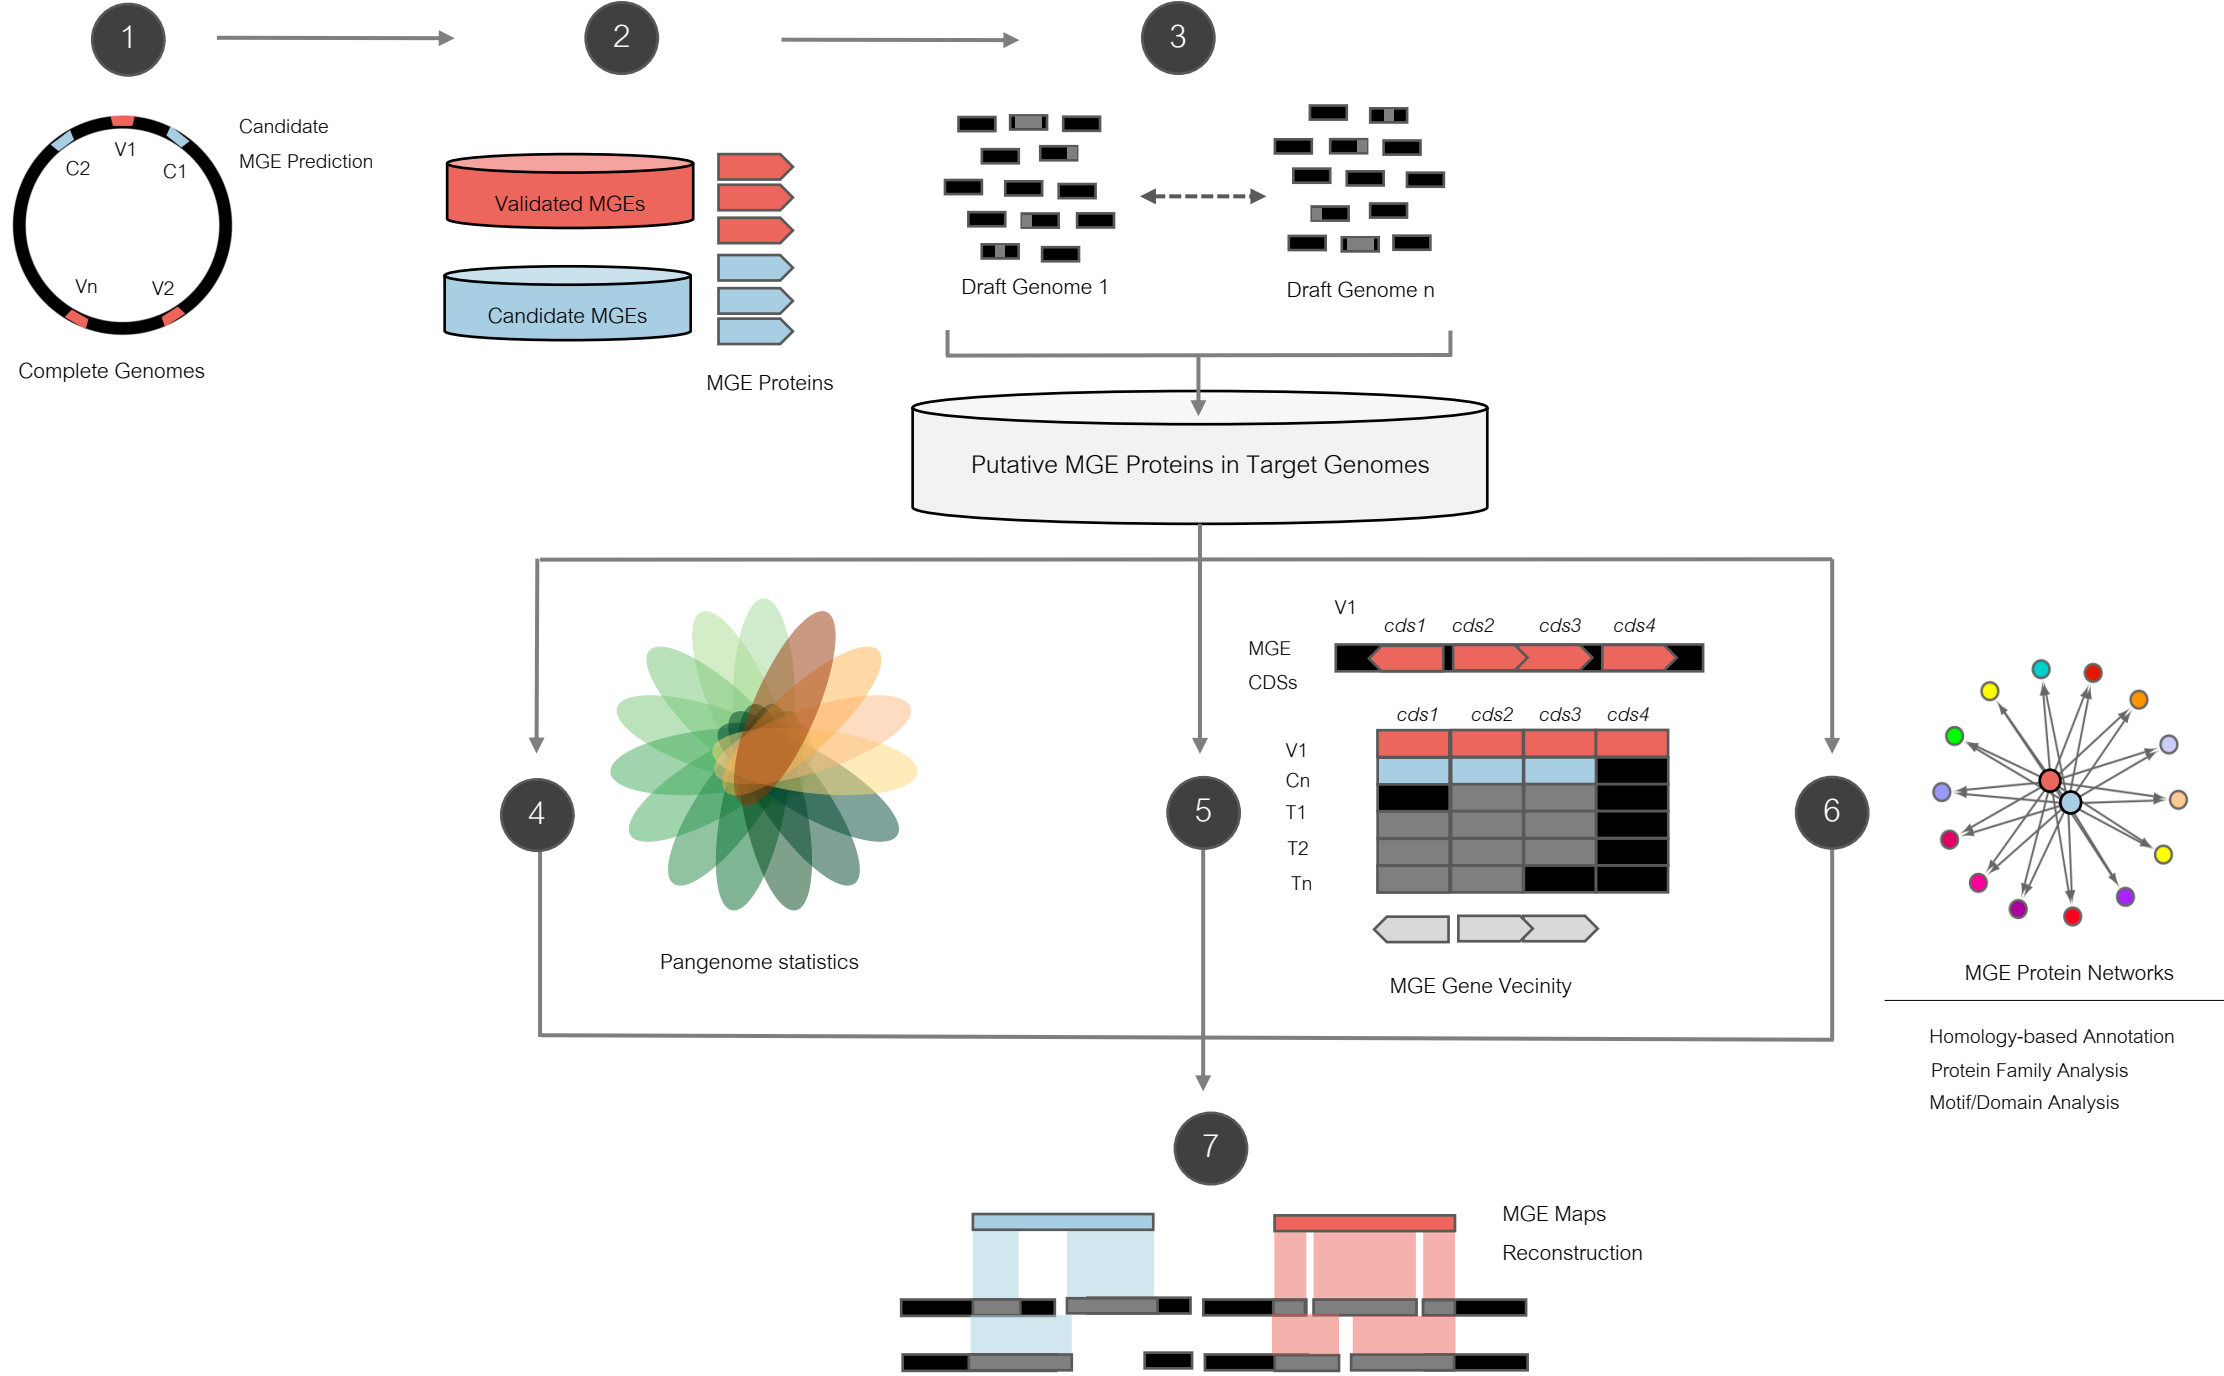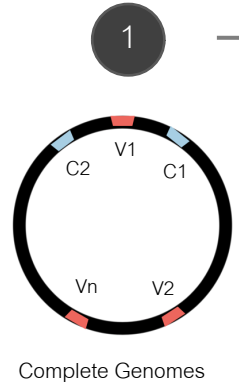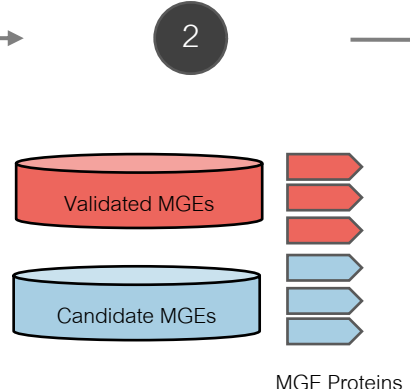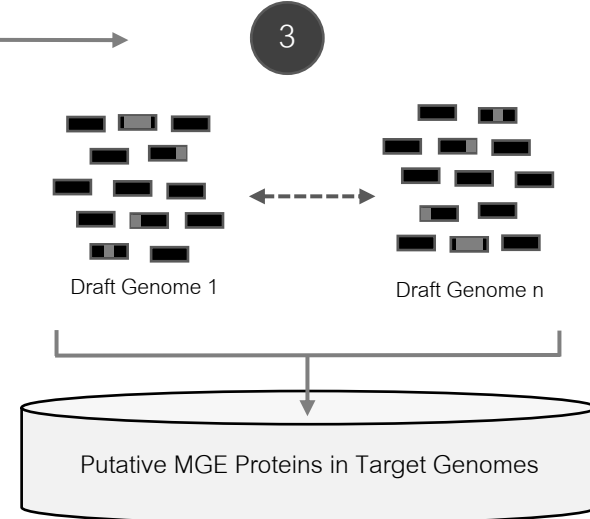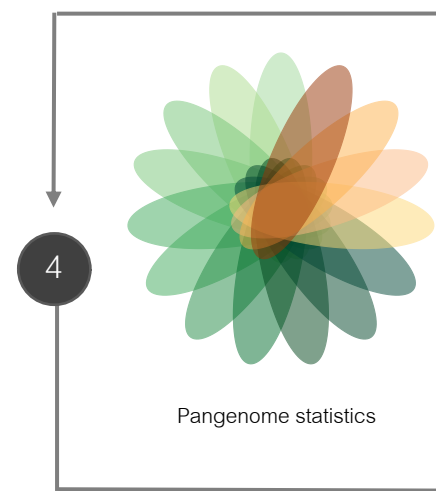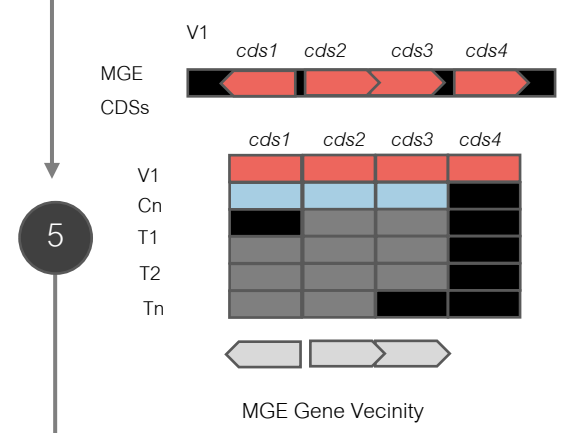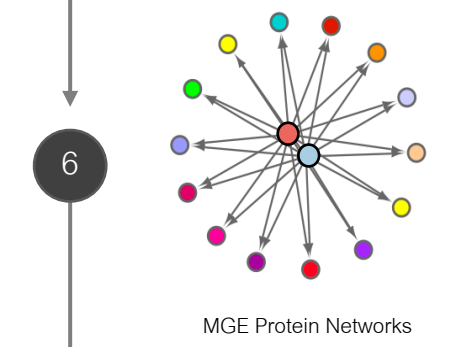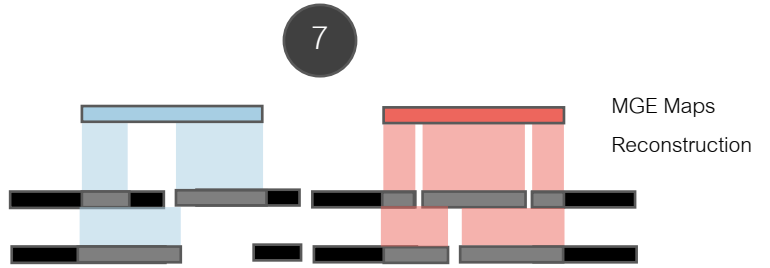

Supplement: 41598_2023_37341_MOESM2_ESM.pdf [file 41598_2023_37341_MOESM2_ESM.pdf]
