# Supplementary material for: Influence of mobile genetic elements and insertion sequences in long- and short-term adaptive processes of Acidithiobacillus ferrooxidans strains
Source: PubMed Central journal article supplement (PMC10322971; doi:10.1038/s41598-023-37341-4), 2023-07-05
Supplement: 41598_2023_37341_MOESM3_ESM.pdf [file 41598_2023_37341_MOESM3_ESM.pdf]

# A Experiment 1

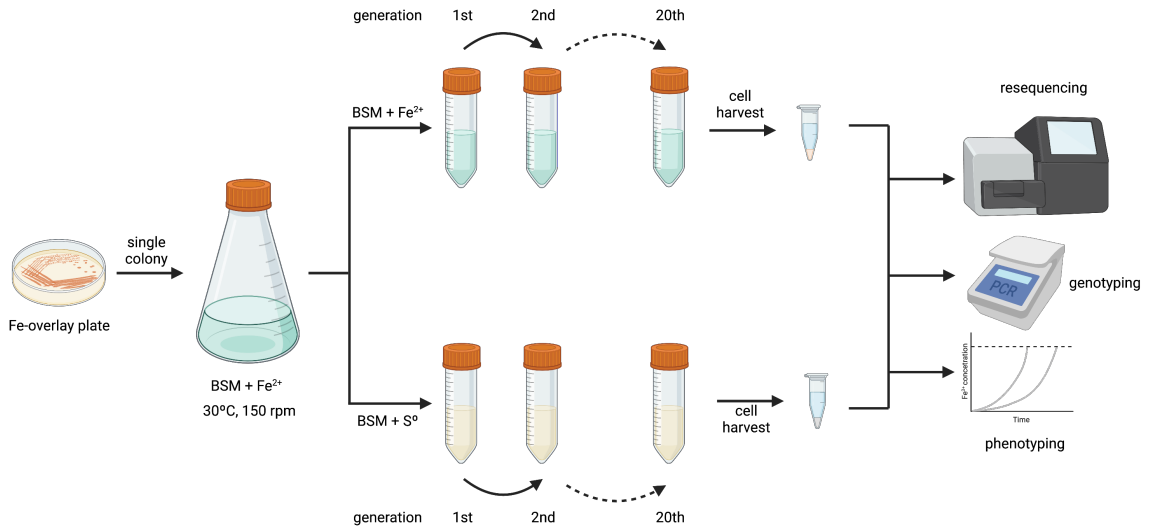

# B Experiment 2

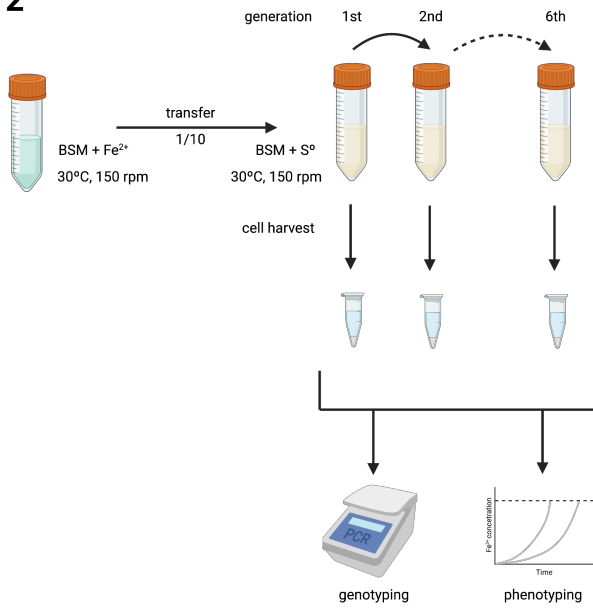

# C Experiment 3

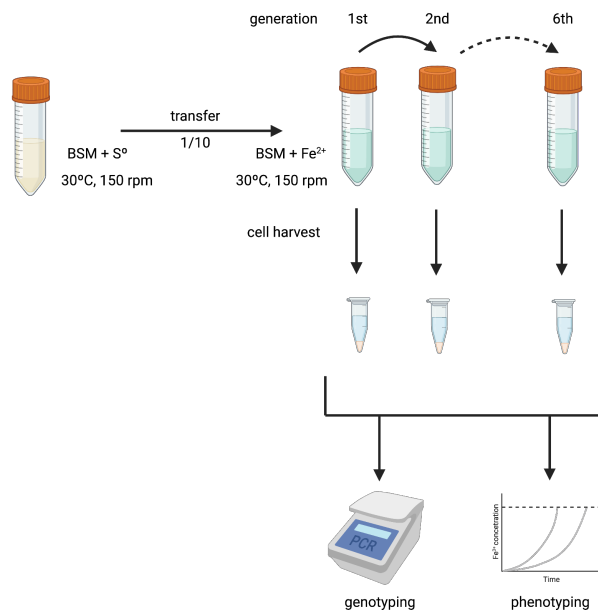

**D****Exposure 1**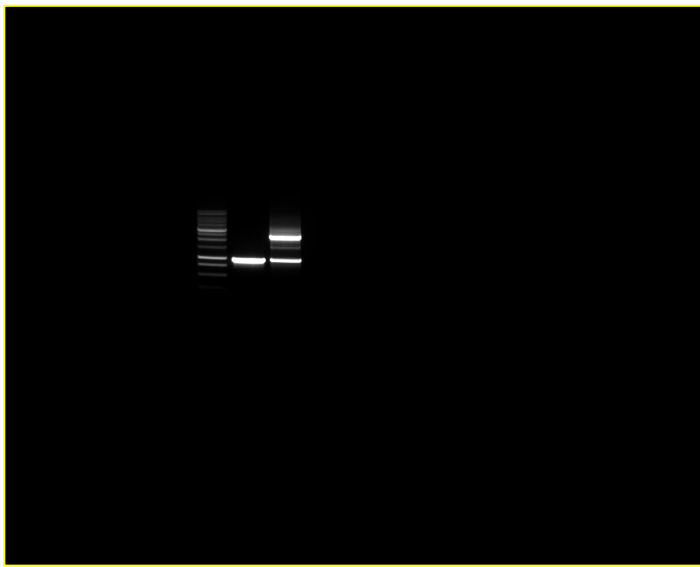**Exposure 2**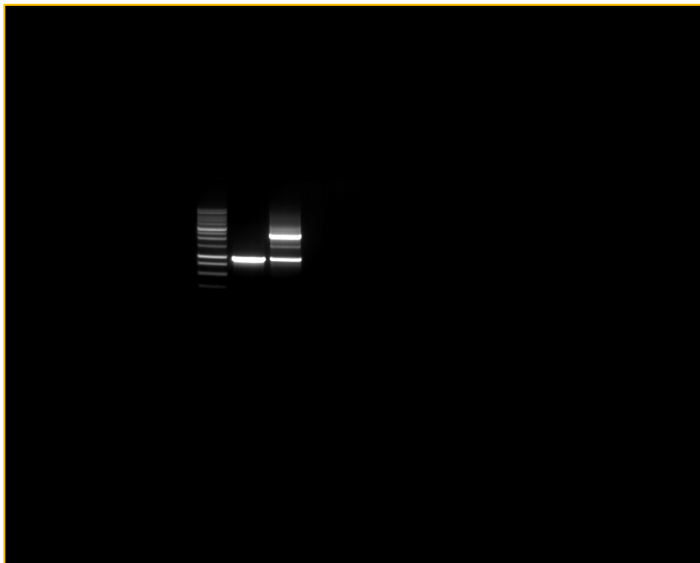**Exposure 3**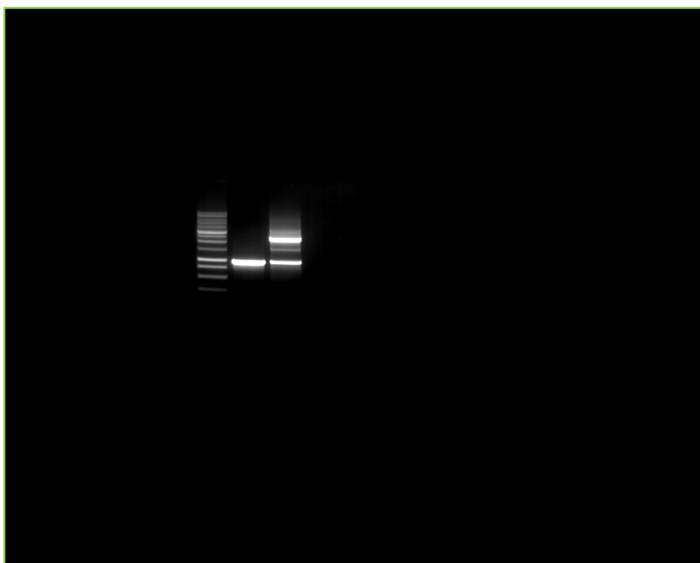

Original gel image at three different exposures for cropped gel in **Fig. 6C** corresponding to the PCR evaluation of the transpositional mutation in the long-term iron- and sulfur-adapted cultures (*Experiment 1*). Lane M represents a 1-kb DNA ladder; lane Fe<sup>2+</sup> represents the PCR product of the *pstC2* locus from the iron-adapted culture; lane S<sup>0</sup> represents the PCR product of the *pstC2* locus from the sulfur-adapted culture.

E

Exposure 1

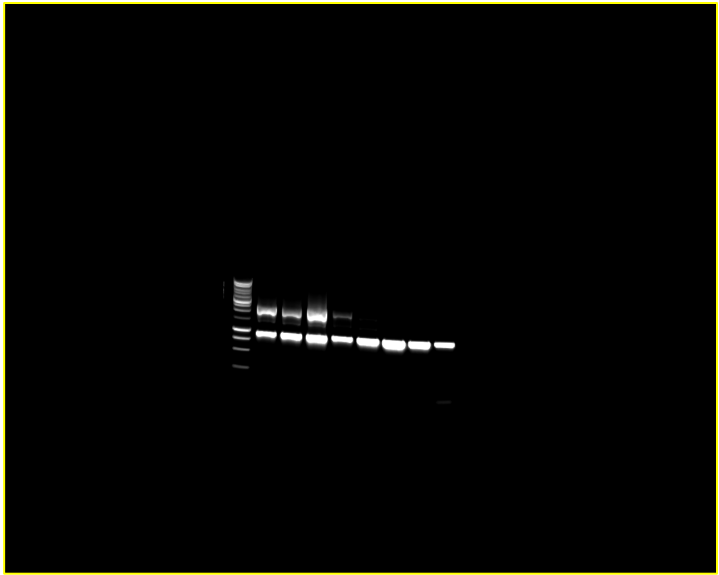

Exposure 2

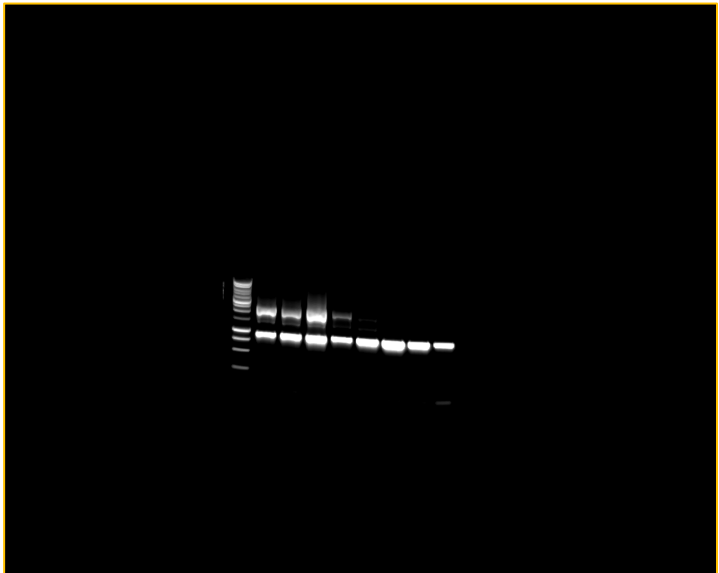

Exposure 3

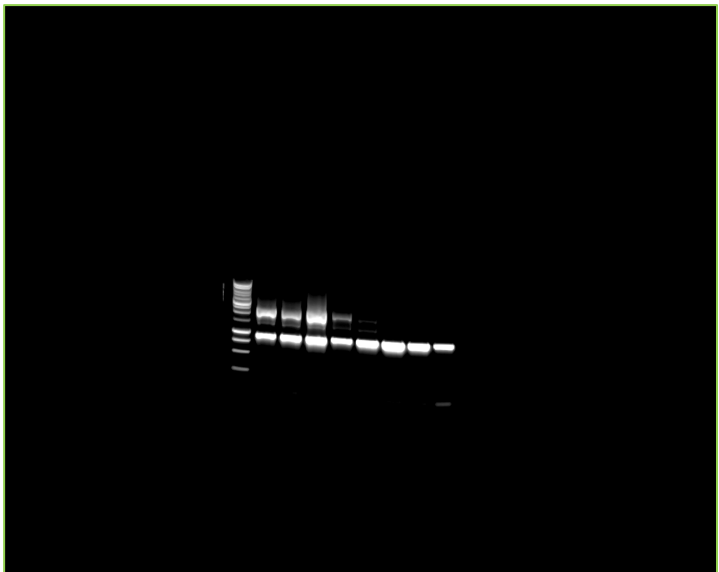

Original gel image at three different exposures for cropped gel in **Fig. 6D** corresponding to the PCR evaluation of reversal of the transpositional mutation during subsequent culture transfers (*Experiment 2*). Lane M represents a 1-kb DNA ladder; lanes 1–6 represent the PCR product of the *pstC2* locus from the first to sixth individual iron passages performed.
